# Supplementary material for: Novel insights on magadiite disaggregation: a multitechnique study on thermal stability
Source: Royal Society of Chemistry journal article supplement (doi:10.1039/c3cp51491a), 2013-01-01
Supplement: c3cp51491a.pdf [file c3cp51491a.pdf]

Supplementary Material for

## Novel Insights on Magadiite Disaggregation: A multitechnique study on thermal stability

Juliana Martins de Souza e Silva,<sup>a,b</sup> Geo Paul,<sup>a</sup> James Bendall,<sup>c</sup> Chiara Bisio,<sup>a</sup> Heloise O. Pastore,<sup>\*b</sup> and Leonardo Marchese<sup>\*a</sup>

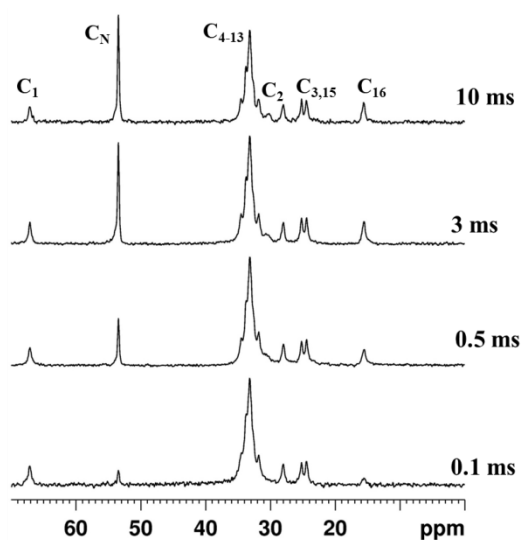

**Figure S1.**  $^{13}\text{C}$  solid state variable contact time CPMAS NMR spectra of CTA-magadiite at a MAS rate of 10 kHz.

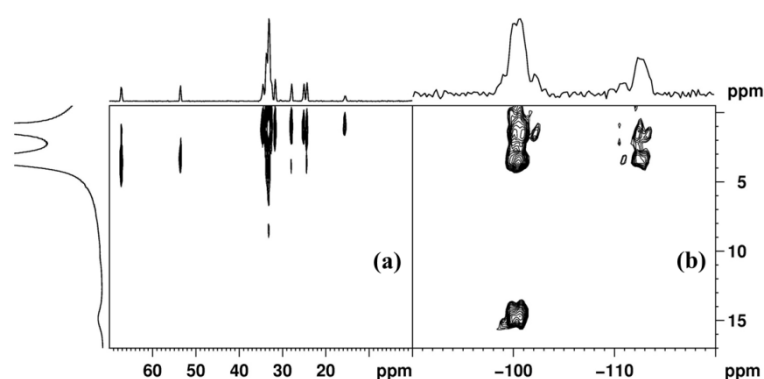

**Figure S2.** 2D  $^1\text{H}$ - $^{13}\text{C}$  HETCOR (a) and  $^1\text{H}$ - $^{29}\text{Si}$  HETCOR (b) NMR spectra of CTA-magadiite along with 2D projections on the  $^{13}\text{C}$  and  $^{29}\text{Si}$  dimensions. A MAS rate of 12240 Hz and a contact time of 0.3 ms and 2 ms was used in the  $^1\text{H}$ - $^{13}\text{C}$  HETCOR and  $^1\text{H}$ - $^{29}\text{Si}$  HETCOR experiments, respectively.  $^1\text{H}$  MAS NMR spectrum of CTA-magadiite is given in the  $^1\text{H}$  dimension.

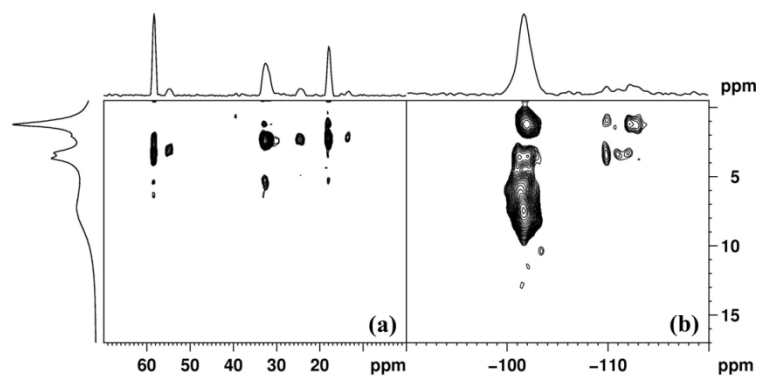

**Figure S3.** 2D  $^1\text{H}$ - $^{13}\text{C}$  HETCOR (a) and  $^1\text{H}$ - $^{29}\text{Si}$  HETCOR (b) NMR spectra of disaggregated magadiite along with 2D projections on the  $^{13}\text{C}$  and  $^{29}\text{Si}$  dimensions. A MAS rate of 12240 Hz and a contact time of 2 ms was used in the experiments.  $^1\text{H}$  MAS NMR spectrum of disaggregated magadiite is given in the  $^1\text{H}$  dimension.

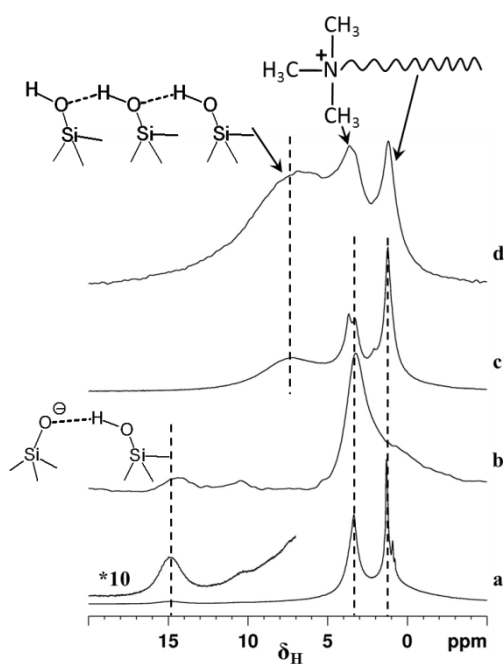

**Figure S4.**  $^1\text{H}$ - $^{29}\text{Si}$ - $^1\text{H}$  double CP spectra on CTA-magadiite (b) and disaggregated magadiite (d). The efficiency of the technique is demonstrated by comparing with the  $^1\text{H}$  MAS NMR spectra of CTA-magadiite (a) and disaggregated magadiite (c) (see text for details).
